# Supplementary material for: The Neural Basis of Testable and Non-Testable Beliefs
Source: PLoS One. 2015 May 5;10(5):e0124596. doi: 10.1371/journal.pone.0124596 (PMC4420500; doi:10.1371/journal.pone.0124596)
Supplement: S8 Dataset — Mean % signal change and standard error of the mean for each significant cluster for the main effect of certainty. (CSV) [file pone.0124596.s008.csv]

Cluster	NonTestable_Definitely_Mean	NonTestable_Possibly_Mean	NonTestable_PossiblyNot_Mean	NonTestable_DefinitelyNot_Mean	Testable_Definitely_Mean	Testable_Possibly_Mean	Testable_PossiblyNot_Mean	Testable_DefinitelyNot_Mean	NonTestable_Definitely_SEM	NonTestable_Possibly_SEM	NonTestable_PossiblyNot_SEM	NonTestable_DefinitelyNot_SEM	Testable_Definitely_SEM	Testable_Possibly_SEM	Testable_PossiblyNot_SEM	Testable_DefinitelyNot_SEM
1	0.139319353	-0.175255007	-0.06131975	0.3796348	0.216593836	-0.0039602	0.011223933	0.176582971	0.070481519	0.198554504	0.066955834	0.075450058	0.07817502	0.080777799	0.055623225	0.075818567
2	0.264300186	-0.203444686	-0.078049007	0.260635829	0.101364764	0.030728243	0.041955515	0.150368343	0.096774085	0.094581627	0.065880427	0.099699225	0.067092659	0.060495917	0.03536373	0.081477878
3	0.293603064	-0.105821714	0.015265329	0.369729164	0.143214707	-0.024333243	-0.033392229	0.041996786	0.089520726	0.187015268	0.06377786	0.082371632	0.074537926	0.076205809	0.040255278	0.075428309
4	-0.072042193	-0.625901543	-0.281525529	0.340547157	0.364758271	-0.002034564	0.128948421	0.36617165	0.120726082	0.344090619	0.081171239	0.139152524	0.201969887	0.182334807	0.116724006	0.184035918
5	0.014789886	-0.422800307	-0.139435007	0.179100629	-0.268262964	-0.42544835	-0.331887036	-0.148470579	0.08980269	0.207597527	0.067234516	0.09543358	0.085814643	0.109736897	0.073357925	0.082799677
6	0.108040193	-0.233371221	-0.139298371	0.148639707	0.044827171	-0.033914271	-0.012723421	0.151076537	0.082252031	0.122063386	0.05481967	0.084217336	0.079061646	0.070856219	0.028103296	0.087806226
7	0.0667818	-0.353369781	-0.252294475	0.244878693	0.019141757	-0.113443421	-0.052425514	0.019419807	0.088037874	0.232187307	0.082445971	0.079151022	0.103956147	0.092640873	0.042835889	0.084944068
8	0.034848123	-0.354337695	-0.239125526	0.063508348	-0.047925021	-0.121706024	-0.095452129	0.019814607	0.084197553	0.179776123	0.061564798	0.08311188	0.068098065	0.088040981	0.055266201	0.075531047
9	-0.029433986	-0.3068048	-0.221291079	0.016526843	-0.093905256	-0.194137771	-0.111530557	-0.075751564	0.055495827	0.097299424	0.049409541	0.048948586	0.045186262	0.08113245	0.046214465	0.062508317
10	0.094535018	-0.159112064	0.029865729	0.269778986	0.096920172	0.012745386	0.035975641	0.161836057	0.076756887	0.10896669	0.045224793	0.066541494	0.083431784	0.059918475	0.0392035	0.078591133
11	0.432430115	0.014001071	0.085653786	0.42134255	0.298749014	0.240839529	0.191084657	0.333576186	0.119960785	0.153681929	0.073056157	0.130306249	0.124669862	0.080229607	0.062140686	0.093943732
12	0.421462412	0.0275495	0.138163836	0.758878843	0.347827621	0.213879332	0.355702257	0.467659093	0.132012059	0.240880196	0.129279369	0.207264056	0.167897115	0.131384513	0.134701523	0.10963711
13	0.280540321	-0.284714293	0.044233996	0.407062814	-0.08838	-0.103332586	-0.108210886	0.042868736	0.099026572	0.202246418	0.069949321	0.113905304	0.142667505	0.12460316	0.086619908	0.095167526
14	0.154614471	-0.248304093	-0.171739157	0.23639575	-0.1006662	-0.167216086	-0.113034326	-0.012059371	0.096893312	0.207898373	0.0731219	0.061036236	0.101104484	0.081977095	0.048247384	0.083808034
15	0.25362545	-0.257405043	-0.215021263	0.212446489	-0.011692671	-0.004660493	-0.006604721	0.063593829	0.149631461	0.165147905	0.072101695	0.060390812	0.111244447	0.063333543	0.062024217	0.059872298
